# Supplementary material for: Development of a System and Method for Automated Isolation of Stromal Vascular Fraction from Adipose Tissue Lipoaspirate
Source: Hindawi journal article supplement (doi:10.1155/2015/109353), 2015-01-01
Supplement: f1 [file 109353.f1.pdf]

**Supplementary Table 1: Comparison of SVF cell counts obtained by manual counting vs. automated counting methods.**

| <b>Sample ID</b> | <b>Manual count<br/>(x 10<sup>6</sup>)</b> | <b>Automated count<br/>(x 10<sup>6</sup>)</b> |
|------------------|--------------------------------------------|-----------------------------------------------|
| Sample 1         | 2.56                                       | 2.09                                          |
| Sample 2         | 0.52                                       | 0.69                                          |
| Sample 3         | 1.81                                       | 1.93                                          |
| Sample 4         | 1.89                                       | 1.71                                          |
| Sample 5         | 2.77                                       | 1.64                                          |
| Sample 6         | 8.05                                       | 3.43                                          |
| Sample 7         | 5.55                                       | 6.14                                          |
| Sample 8         | 6.45                                       | 5.17                                          |
| Mean±SD          | 3.7±2.6                                    | 2.8±1.9                                       |

**Supplementary Table 2: Yield and viability of SVF from lipoaspirates processed before and after passing through peristaltic pump.**

| Sample ID | Control                           |                  | Per. Pump.                        |                  |
|-----------|-----------------------------------|------------------|-----------------------------------|------------------|
|           | Yield<br>(x10 <sup>5</sup> /gram) | Viability<br>%   | Yield<br>(x10 <sup>5</sup> /gram) | Viability<br>%   |
| Sample 1  | 2.4                               | 95%              | 1.7                               | 94%              |
| Sample 2  | 2.6                               | 98%              | 3.0                               | 98%              |
| Sample 3  | 0.56                              | 98%              | 0.87                              | 98%              |
| Mean±SD   | <b>1.85±1.1</b>                   | <b>96.7±2.3%</b> | <b>1.86±1.1</b>                   | <b>97.0±1.7%</b> |

Difference between the control and per. pump. groups is not significant (p=0.99, paired t-test).

### Supplementary figure 1

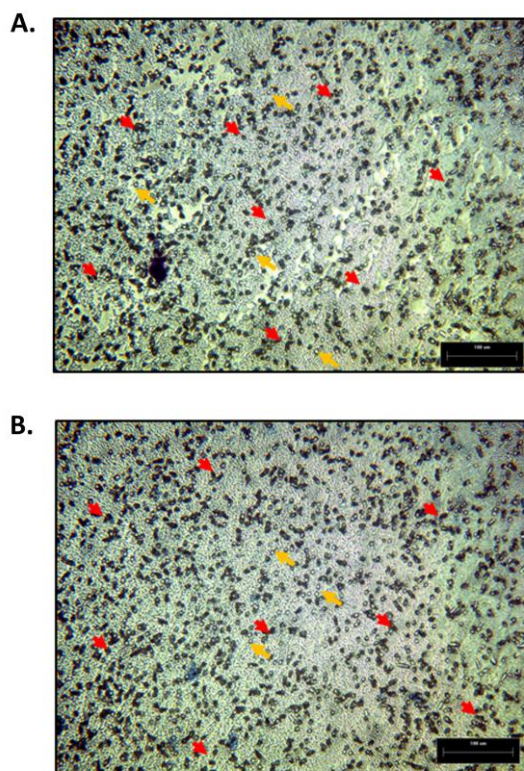

**Supplementary figure 1. Retention of SVF cells on 5 µm polycarbonate track etch filters (PCTE).** The aqueous phase of digested lipoaspirate tissue was sequentially filtered through nylon filters of 100 µm and 35 µm pore size and SVF cells were ultimately recovered on a 5 µm PCTE filter. The 5 µm PCTE filter was then fixed in 1% paraformaldehyde for 20 min, stained with 0.1% toluidine blue (in 1% formaldehyde solution) for 1 h and then rinsed with water. Cells retained on the filter were visualized by light microscopy. Micrographs show a representative set of images from two different samples (A) & (B). Arrowheads indicate stained SVF cells (red) and filter pores (yellow). Scale bars=100 µm.
